# Supplementary material for: Structural basis of actin filament assembly and aging
Source: PubMed Central journal article supplement (PMC9646518; doi:10.1038/s41586-022-05241-8), 2022-10-26
Supplement: 41586_2022_5241_MOESM1_ESM.pdf [file 41586_2022_5241_MOESM1_ESM.pdf]

**Supplementary information**

---

**Structural basis of actin filament assembly and aging**

---

In the format provided by the authors and unedited

**Supplementary Table 1. Cryo-EM data collection, refinement and validation statistics for Mg<sup>2+</sup>-F-actin datasets.**

| <b>F-actin state</b>                                | <b>Mg<sup>2+</sup>-ADP-BeF<sub>3</sub><sup>-</sup></b><br>EMD-15104<br>PDB 8A2R | <b>Mg<sup>2+</sup>-ADP-P<sub>i</sub></b><br>EMD-15105<br>PDB 8A2S | <b>Mg<sup>2+</sup>-ADP</b><br>EMD-15106<br>PDB 8A2T |
|-----------------------------------------------------|---------------------------------------------------------------------------------|-------------------------------------------------------------------|-----------------------------------------------------|
| <b>Data collection and processing</b>               |                                                                                 |                                                                   |                                                     |
| Magnification                                       | 130,000                                                                         | 130,000                                                           | 130,000                                             |
| Voltage (kV)                                        | 300                                                                             | 300                                                               | 300                                                 |
| Electron exposure (e <sup>-</sup> /Å <sup>2</sup> ) | 78.9                                                                            | 88.8                                                              | 76.4                                                |
| Defocus range (μm)                                  | -0.7 to -2.0                                                                    | -0.7 to -2.0                                                      | -0.7 to -2.0                                        |
| Pixel size (Å)                                      | 0.695                                                                           | 0.695                                                             | 0.695                                               |
| Symmetry imposed                                    | C1                                                                              | C1                                                                | C1                                                  |
| Initial particle images (no.)                       | 2,897,679                                                                       | 2,349,979                                                         | 1,296,776                                           |
| Final particle images (no.)                         | 2,228,553                                                                       | 1,808,554                                                         | 1,114,051                                           |
| Map resolution (Å)                                  | 2.17                                                                            | 2.22                                                              | 2.24                                                |
| 0.143 FSC threshold                                 |                                                                                 |                                                                   |                                                     |
| Map resolution range (Å)                            | 2.1 – 3.2                                                                       | 2.2 – 3.2                                                         | 2.2 – 3.4                                           |
| Measured helical symmetry                           |                                                                                 |                                                                   |                                                     |
| Helical rise (Å)                                    | 27.47±0.05                                                                      | 27.50±0.02                                                        | 27.50±0.07                                          |
| Helical twist (°)                                   | 166.6±0.2                                                                       | 166.5±0.4                                                         | 166.7±0.1                                           |
| <b>Refinement</b>                                   |                                                                                 |                                                                   |                                                     |
| Initial model used (PDB code)                       | 8A2Z                                                                            | 8A2Z                                                              | 8A2Z                                                |
| Model resolution (Å)                                | 2.20                                                                            | 2.28                                                              | 2.35                                                |
| 0.5 FSC threshold                                   |                                                                                 |                                                                   |                                                     |
| Map sharpening <i>B</i> factor (Å <sup>2</sup> )    | -50                                                                             | -64                                                               | -65                                                 |
| Model composition                                   |                                                                                 |                                                                   |                                                     |
| Non-hydrogen atoms                                  | 14,990                                                                          | 15,141                                                            | 15,046                                              |
| Protein residues                                    | 1,830                                                                           | 1,835                                                             | 1,830                                               |
| Waters                                              | 480                                                                             | 591                                                               | 556                                                 |
| Ligands                                             | 15                                                                              | 15                                                                | 10                                                  |
| <i>B</i> factors (Å <sup>2</sup> )                  |                                                                                 |                                                                   |                                                     |
| Protein                                             | 31.53                                                                           | 34.56                                                             | 38.07                                               |
| Waters                                              | 31.82                                                                           | 23.19                                                             | 31.98                                               |
| Ligand                                              | 22.89                                                                           | 31.58                                                             | 31.71                                               |
| R.m.s. deviations                                   |                                                                                 |                                                                   |                                                     |
| Bond lengths (Å)                                    | 0.004                                                                           | 0.008                                                             | 0.003                                               |
| Bond angles (°)                                     | 0.592                                                                           | 0.669                                                             | 0.549                                               |
| Validation                                          |                                                                                 |                                                                   |                                                     |
| EM-ringer score                                     | 5.94                                                                            | 6.45                                                              | 5.89                                                |
| MolProbity score                                    | 1.17                                                                            | 1.12                                                              | 1.03                                                |
| Clashscore                                          | 2.75                                                                            | 3.33                                                              | 2.50                                                |
| Poor rotamers (%)                                   | 0.65                                                                            | 0.64                                                              | 0.32                                                |
| Ramachandran plot                                   |                                                                                 |                                                                   |                                                     |
| Favored (%)                                         | 97.49                                                                           | 98.06                                                             | 98.05                                               |
| Allowed (%)                                         | 2.51                                                                            | 1.94                                                              | 1.95                                                |
| Disallowed (%)                                      | 0                                                                               | 0                                                                 | 0                                                   |

**Supplementary Table 2. Cryo-EM data collection, refinement and validation statistics for Ca<sup>2+</sup>-F-actin datasets.**

| <b>F-actin state</b>                                | <b>Ca<sup>2+</sup>-ADP-BeF<sub>3</sub><sup>-</sup></b><br>EMD-15107<br>PDB 8A2U | <b>Ca<sup>2+</sup>-ADP-P<sub>i</sub></b><br>EMD-15108<br>PDB 8A2Y | <b>Ca<sup>2+</sup>-ADP</b><br>EMD-15109<br>PDB 8A2Z |
|-----------------------------------------------------|---------------------------------------------------------------------------------|-------------------------------------------------------------------|-----------------------------------------------------|
| <b>Data collection and processing</b>               |                                                                                 |                                                                   |                                                     |
| Magnification                                       | 130,000                                                                         | 130,000                                                           | 130,000                                             |
| Voltage (kV)                                        | 300                                                                             | 300                                                               | 300                                                 |
| Electron exposure (e <sup>-</sup> /Å <sup>2</sup> ) | 84.6                                                                            | 88.8                                                              | 75.6                                                |
| Defocus range (μm)                                  | -0.7 to -2.0                                                                    | -0.7 to -2.0                                                      | -0.7 to -2.0                                        |
| Pixel size (Å)                                      | 0.695                                                                           | 0.695                                                             | 0.695                                               |
| Symmetry imposed                                    | C1                                                                              | C1                                                                | C1                                                  |
| Initial particle images (no.)                       | 2,246,622                                                                       | 3,031,270                                                         | 1,873,773                                           |
| Final particle images (no.)                         | 1,719,432                                                                       | 2,171,987                                                         | 1,073,455                                           |
| Map resolution (Å)                                  | 2.21                                                                            | 2.15                                                              | 2.15                                                |
| 0.143 FSC threshold                                 |                                                                                 |                                                                   |                                                     |
| Map resolution range (Å)                            | 2.15 – 3.2                                                                      | 2.1 – 3.1                                                         | 2.1 – 3.5                                           |
| Measured helical symmetry                           |                                                                                 |                                                                   |                                                     |
| Helical rise (Å)                                    | 27.46±0.05                                                                      | 27.47±0.08                                                        | 27.47±0.05                                          |
| Helical twist (°)                                   | 166.7±0.1                                                                       | 166.6±0.1                                                         | 166.5±0.1                                           |
| <b>Refinement</b>                                   |                                                                                 |                                                                   |                                                     |
| Initial model used (PDB code)                       | 8A2Z                                                                            | 8A2Z                                                              | 7AHN                                                |
| Model resolution (Å)                                | 2.23                                                                            | 2.16                                                              | 2.17                                                |
| 0.5 FSC threshold                                   |                                                                                 |                                                                   |                                                     |
| Map sharpening <i>B</i> factor (Å <sup>2</sup> )    | -55                                                                             | -55                                                               | -55                                                 |
| Model composition                                   |                                                                                 |                                                                   |                                                     |
| Non-hydrogen atoms                                  | 15,022                                                                          | 15,078                                                            | 15,060                                              |
| Protein residues                                    | 1,830                                                                           | 1,835                                                             | 1,830                                               |
| Waters                                              | 512                                                                             | 528                                                               | 570                                                 |
| Ligands                                             | 15                                                                              | 15                                                                | 10                                                  |
| <i>B</i> factors (Å <sup>2</sup> )                  |                                                                                 |                                                                   |                                                     |
| Protein                                             | 24.67                                                                           | 21.12                                                             | 26.49                                               |
| Waters                                              | 23.66                                                                           | 23.30                                                             | 28.02                                               |
| Ligand                                              | 16.14                                                                           | 15.86                                                             | 20.53                                               |
| R.m.s. deviations                                   |                                                                                 |                                                                   |                                                     |
| Bond lengths (Å)                                    | 0.003                                                                           | 0.004                                                             | 0.003                                               |
| Bond angles (°)                                     | 0.542                                                                           | 0.596                                                             | 0.568                                               |
| Validation                                          |                                                                                 |                                                                   |                                                     |
| EM-ringer score                                     | 6.31                                                                            | 6.39                                                              | 6.56                                                |
| MolProbity score                                    | 1.17                                                                            | 1.02                                                              | 0.99                                                |
| Clashscore                                          | 2.75                                                                            | 2.39                                                              | 1.81                                                |
| Poor rotamers (%)                                   | 0.65                                                                            | 0.64                                                              | 0.00                                                |
| Ramachandran plot                                   |                                                                                 |                                                                   |                                                     |
| Favored (%)                                         | 97.49                                                                           | 98.06                                                             | 97.77                                               |
| Allowed (%)                                         | 2.51                                                                            | 1.94                                                              | 1.95                                                |
| Disallowed (%)                                      | 0                                                                               | 0                                                                 | 0.28                                                |

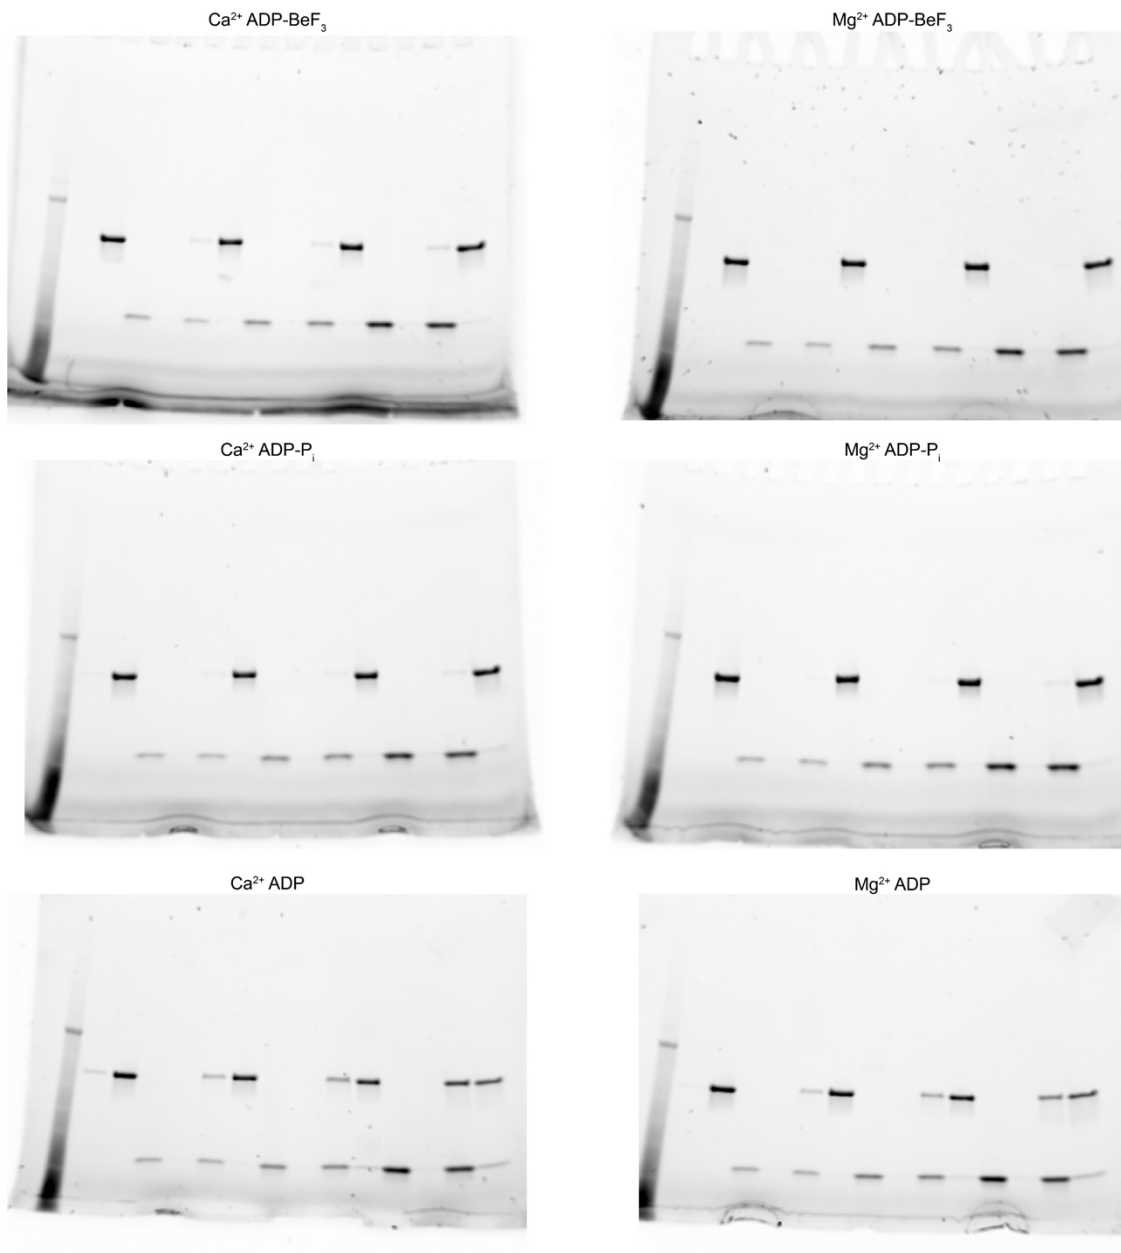

**Supplementary Figure 1. Uncropped gel images.**

This figure depicts uncropped versions of the gels shown in Extended Data Fig. 10a.
